# Supplementary material for: Spontaneous body wall contractions stabilize the fluid microenvironment that shapes host–microbe associations
Source: eLife. 2023 Jul 3;12:e83637. doi: 10.7554/eLife.83637 (PMC10396340; doi:10.7554/eLife.83637)
Supplement: Figure 4—figure supplement 2—source data 1. [file elife-83637-fig4-figsupp2-data1.xlsx]

## Sheet: Tabelle1
			Anosim **		Adonis *
Treatment	Experiment	Metric	R	P-value	R2	P-value
Inhibitors	1	Bray-Curtis	0.4168	0.001 ***	0.36658	0.001 ***
	2	Weighted Unifrac	0.2189	0.002 **	0.22768	0.005 **
	3	Binary Pearson	0.6667	0.001 ***	0.30914	0.001 ***
Light	2	Bray-Curtis	0.144728	0.005	0.28759	0.002 **
	2	Weighted Unifrac	0.3793	0.001 ***	0.35018	0.001 ***
	2	Binary Pearson	0.1812	0.001 ***	0.12834	0.001 ***
		*sample_data
		**999_permutations
